# Supplementary material
Source: Elsevier journal article supplement (https://www.sciencedirect.com/science/article/pii/S1130239918300282)
Supplement: mmc1 [file S1130239918300282:mmc1.docx]

**ANEXO 1**

**MANUAL DE EXTRACCIÓN DE HEMOCULTIVOS EN LA UNIDAD DE CUIDADOS INTENSIVOS.**

**Material necesario**

- Frascos de hemocultivo (aerobio y anaerobio).
- Compresor
- Jeringas
- Agujas del calibre adecuado
- Mascarilla
- Gasas estériles
- Guantes estériles
- Paño estéril
- Alcohol etílico 70%.
- Clorhexidina alcohólica al 2%

**Obtención de la muestra**

- Explicación del procedimiento al paciente, si procede.
- Retirar los tapones externos de los frascos.
- Desinfectar los tapones de goma con alcohol 70º.
- Localizar el vaso a puncionar.
- Si la zona no estuviera limpia, lavar con agua y jabón, aclarar y secar, previa a la desinfección.
- Con técnica aséptica, desinfectar con alcohol 70º, dejar secar y aplicar clorhexidina alcohólica 2%. Se comenzará por el centro y se irán haciendo círculos concéntricos hacia el exterior, dejándolo secar durante 2 minutos, cubriendo un área de al menos 3-5 cm de diámetro alrededor de la zona de punción.
- Colocación de mascarilla.
- Colocación del compresor, si la punción va a ser venosa.
- Correcta higiene de manos.
- Colocación de guantes estériles y paño estéril alrededor de la zona de punción.
- El volumen óptimo de extracción, por frasco, será de 5 – 10 ml.
- El asistente en el procedimiento, será el encargado de retirar el compresor y comprimir, con gasa estéril, el punto de punción.
- Debe evitarse, en todo momento, contaminar la aguja en la retirada.
- No se recomienda cambiar la aguja para inyectar en los frascos.
- Primero se introducirá la muestra en el frasco anaerobio y después el aerobio, evitando en todo momento la entrada de aire y ambos se moverán varias veces para mezclar la sangre con el medio de cultivo.
- Inyectar la sangre en los frascos de cultivo dentro del primer minuto después de su extracción.
- La extracción no debe realizarse a través de catéteres intravasculares, salvo que se realice en el momento de la inserción.
- Las punciones deben ser de zonas diferentes, siempre que sea posible, pudiéndose realizar de forma simultánea (si dos extractores).
- Deben identificarse los frascos de forma adecuada según el Manual del Servicio de Microbiología del hospital.
- Mantener a temperatura ambiente hasta enviarlo al laboratorio y NO REFRIGERAR NI CONGELAR.
- Registrar en la gráfica el procedimiento.
